# Supplementary material for: Clostridium difficile infection in hospitalized patients with inflammatory bowel disease: Prevalence, risk factors, and prognosis
Source: PubMed Central journal article supplement (PMC5805440; doi:10.1097/md.0000000000009772), 2018-02-02
Supplement: medi-97-e9772-s001.pdf [file medi-97-e9772-s001.pdf]

***Clostridium Difficile* Infection in Hospitalized Patients with Inflammatory Bowel Disease: Prevalence, Risk Factors and Prognosis, Maharshak N**

**Supplementary table 1.** Clinical characteristics of the study population

| Measures <sup>†</sup>                  | CDI+ (N = 28)      | CDI- (N = 355)     | P     |
|----------------------------------------|--------------------|--------------------|-------|
| Fever (°C)                             | 36.7, 36.5-37.0    | 36.8, 36.6-37.2    | 0.138 |
| Heart rate (beat per minute)           | 87.5, 75.0-103.5   | 86.0, 75.0-97.0    | 0.450 |
| Systolic blood pressure (mmHg)         | 116.0, 104.0-125.2 | 118.0, 106.5-130.0 | 0.534 |
| Diastolic blood pressure (mmHg)        | 67.5, 60.0-73.5    | 70.0, 62.0-80.0    | 0.213 |
| Saturation (%)                         | 98.0, 94.0-99.0    | 97.0, 96.0-99.0    | 0.843 |
| White blood cells (10 <sup>9</sup> /L) | 8.25, 6.95-11.7    | 8.9, 6.1-11.8      | 0.597 |
| Neutrophils (10 <sup>9</sup> /L)       | 6.4, 4.4-8.9       | 6.5, 4.1-9.5       | 0.517 |
| Lymphocytes (10 <sup>9</sup> /L)       | 1.5, 0.7-2.1       | 1.3, 0.8-1.9       | 0.763 |
| Hemoglobin (g/dL, mean±SD)             | 11.3±1.8           | 11.3±2.0           | 0.860 |
| Hematocrit (g/dL)                      | 34.5, 30.5-37.7    | 33.0, 29.0-38.0    | 0.556 |
| Platelets (10 <sup>9</sup> /L)         | 315.0, 220.7-387.7 | 318.0, 234.0-411.0 | 0.629 |
| Albumin (g/L)                          | 35.0, 30.2-37.7    | 36.0, 31.0-39.0    | 0.243 |
| Creatinine (mg/dL)                     | 0.9, 0.8-1.0       | 0.9, 0.8-1.08      | 0.573 |
| C-reactive protein (mg/L)              | 80.3, 29.2-114.1   | 49.6, 18.5-101.8   | 0.373 |

<sup>†</sup>Values expressed as median IQR unless otherwise indicated

CDI+, *Clostridium Difficile* Infection positive, CDI-, *Clostridium Difficile* Infection negative; SD, standard deviation

***Clostridium Difficile* Infection in Hospitalized Patients with Inflammatory Bowel Disease: Prevalence, Risk Factors and Prognosis, Maharshak N**

**Supplementary table 2.** Prognosis factors of the study population

|                                                 | <b>CDI+ (N = 28)</b> | <b>CDI- (N = 355)</b> | <b>P</b> |
|-------------------------------------------------|----------------------|-----------------------|----------|
| Hospitalization duration (days, median, IQR)    | 5.0, 3.0-7.0         | 5.0, 3.0-9.0          | 0.885    |
| Recurrent admission up to 1 year (N)            | 42.8% (12)           | 41.1% (146)           | >0.99    |
| Blood transfusion (N)                           | 7.1% (2)             | 4.8% (17)             | 0.309    |
| Abdominal computerized tomographic scan (N)     | 32.1% (9)            | 29.6% (105)           | 0.831    |
| Colonoscopy (N)                                 | 25.0% (7)            | 31.3% (111)           | 0.671    |
| <b>Colectomy (N)</b>                            |                      |                       |          |
| During hospitalization                          | 3.6% (1)             | 3.7% (13)             | >0.99    |
| Up to 1 year post-hospitalization               | 14.3% (3)            | 7.9% (24)             | 0.401    |
| <b>Mortality rate (N)</b>                       |                      |                       |          |
| During hospitalization                          | 7.1% (2)             | 1.4% (5)              | 0.086    |
| 2 months post-hospitalization                   | 0.0% (0)             | 2.0% (7)              | >0.99    |
| From 2 months up to 1 year post-hospitalization | 3.6% (1)             | 3.7% (13)             | >0.99    |

CDI+, *Clostridium Difficile* Infection positive, CDI-, *Clostridium Difficile* Infection negative IQR, interquartile range
